# Supplementary material for: Highly luminescent and cytocompatible cationic Ag2S NIR-emitting quantum dots for optical imaging and gene transfection
Source: Royal Society of Chemistry journal article supplement (doi:10.1039/c5nr00189g), 2015-01-01
Supplement: c5nr00189g1.pdf [file c5nr00189g1.pdf]

## Supplementary information

### Highly luminescent and cytocompatible cationic Ag<sub>2</sub>S NIR-emitting quantum dots for gene transfection and optical imaging

Fatma Demir Duman, Ibrahim Hocaoglu, Deniz Gulfem Ozturk, Alper Kiraz, Devrim Gozuacik, Havva Yagci Acar \*

#### Quantum Yield Calculation

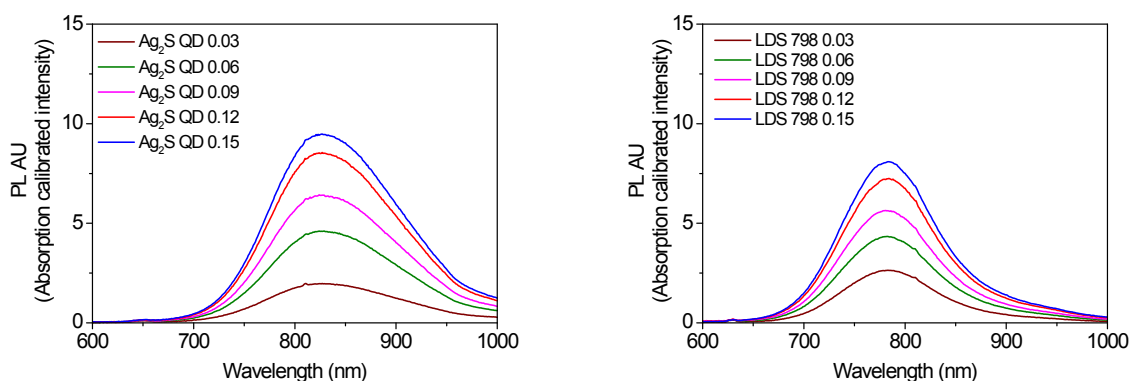

Fig. S1. Photoluminescence spectra of aqueous Ag<sub>2</sub>S NIRQDs (80/20 PEI/2MPA at pH7.4 in water (left) and LDS 798 NIR dye in MeOH (right) at different concentrations.

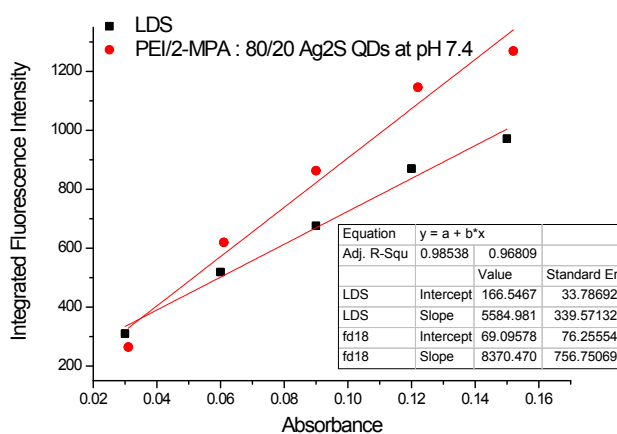

Fig. S2. Plot of the the integrated luminescence intensities of the dye and QD samples against the absorbance. Inset shows the slope of each line.

#### Influence of Ag/S mole ratio on particle properties

In the synthesis of PEI coated Ag<sub>2</sub>S NIRQDs, Ag/S mole ratio of 2.5 and 4 were studied under identical conditions: Coating/Ag ratio of 5, pH 10. Photoluminescence and absorbance graphs of these two particles prepared at room temperature and quenched in 75 min were shown in Fig. S3.

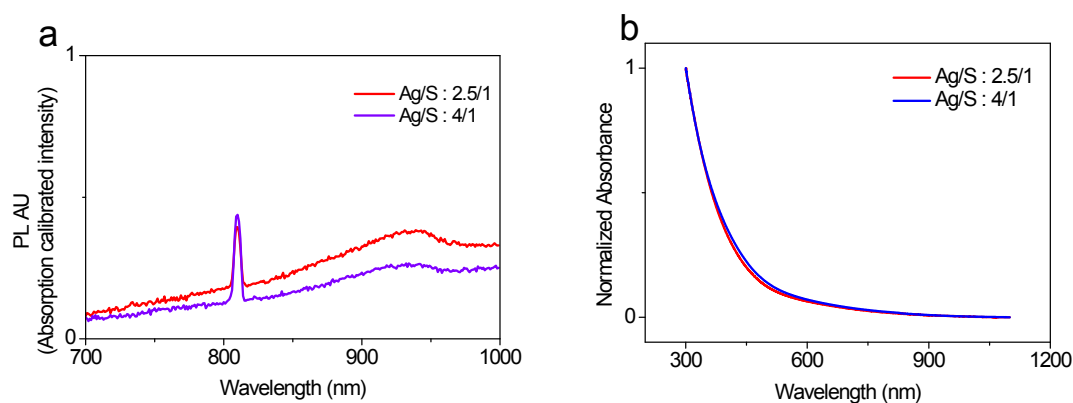

**Fig. S3.** Photoluminescence (a) and absorbance (b) spectra of PEI coated  $\text{Ag}_2\text{S}$  QD prepared at different Ag/S mole ratios.

#### Influence of Ag/PEI ratio on particle properties

In order to determine the best Ag/PEI ratio which would provide effective surface passivation and strong luminescence as well as to influence the crystal size, different Ag/PEI ratios were studied under identical reaction conditions: Ag/S=4, room temperature, pH 10. Photoluminescence and absorbance graphs of PEI coated  $\text{Ag}_2\text{S}$  NIRQDs synthesized with Ag/PEI ratio of 1/5 and 1/15 are shown in Fig. S4.

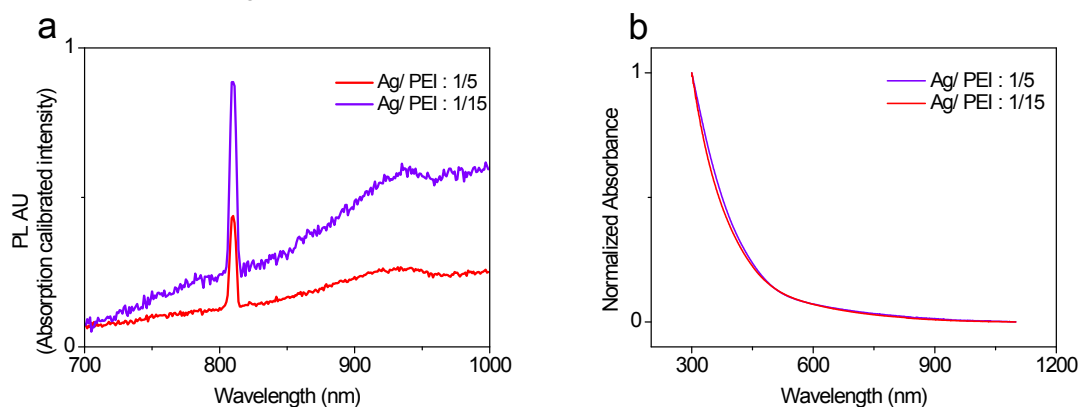

**Fig. S4.** Photoluminescence (a) and absorbance (b) spectra of PEI coated  $\text{Ag}_2\text{S}$  NIRQDs prepared at different Ag/PEI mole ratios.

#### Influence of reaction time on particle properties

Aliquots from reaction mixture were taken out with a syringe at different time points and particle growth and luminescence peak were monitored by UV-absorbance and photoluminescence spectra (Fig. S5). Table S1 summarizes the effects of reaction time on the particle properties for  $\text{Ag}_2\text{S}$  NIRQDs synthesized with 60/40 PEI/2MPA at pH 10 with Ag/S ratio of 4 and coating/Ag ratio of 5 at room temperature.

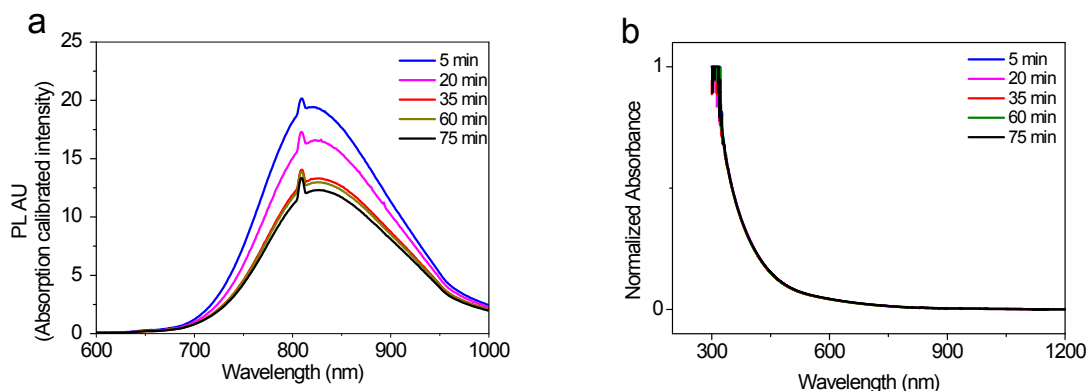

**Fig. S5.** (a) Absorbance calibrated photoluminescence and (b) Normalized absorbance graphs of the  $\text{Ag}_2\text{S}$  NIRQDs prepared with PEI/2MPA 60/40 mixed coating at different time points during the reaction.

**Table S1.** Effect of the reaction time on the properties of Ag<sub>2</sub>S NIRQDs.

| Reaction time (min) | $\lambda_{\text{abs(cutoff)}}$ <sup>a)</sup> (nm) | Size <sup>b)</sup> (nm) | Band gap (eV) | $\lambda_{\text{em (max)}}$ (nm) | FWHM (nm) |
|---------------------|---------------------------------------------------|-------------------------|---------------|----------------------------------|-----------|
| 5                   | 777                                               | 2.52                    | 1.60          | 820                              | 147       |
| 20                  | 777                                               | 2.52                    | 1.60          | 825                              | 148       |
| 35                  | 777                                               | 2.52                    | 1.60          | 828                              | 152       |
| 60                  | 777                                               | 2.52                    | 1.60          | 828                              | 150       |
| 75                  | 777                                               | 2.52                    | 1.60          | 828                              | 148       |

<sup>a)</sup> Absorbance onset; <sup>b)</sup> Diameter of Ag<sub>2</sub>S crystal calculated by Brus equation. Reaction formulation and conditions: Ag/S = 4, Ag/PEI = 1 : 3, Ag/2MPA = 1 : 2, reaction pH : 10, Room Temperature.

#### Effect of PEI/ 2MPA ratio on particle properties

Fig. S6 is the normalized absorbance spectra of the quantum dots prepared with PEI/2MPA coating under identical conditions.

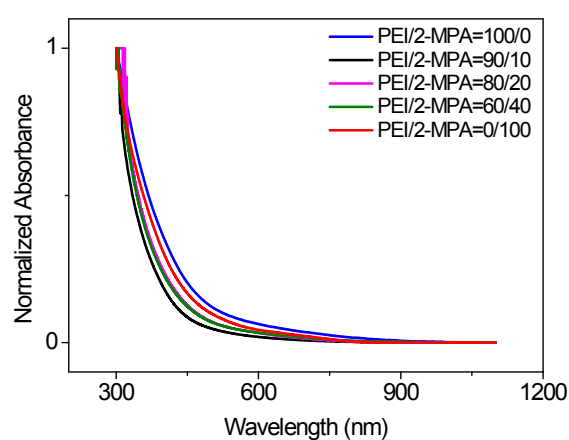

**Fig. S6.** Absorbance spectra of Ag<sub>2</sub>S NIRQDs prepared with different PEI/ 2MPA ratios (Ag : S = 4, RT, reaction pH : 10, 5 min reaction).

#### Influence of reaction pH on particle properties

Ag<sub>2</sub>S NIRQDs synthesized with PEI/2MPA mixture at 60/40 and 80/20 ratios were prepared at different pH values. Fig. S7 shows the normalized absorbance graphs of these synthesized Ag<sub>2</sub>S NIRQDs.

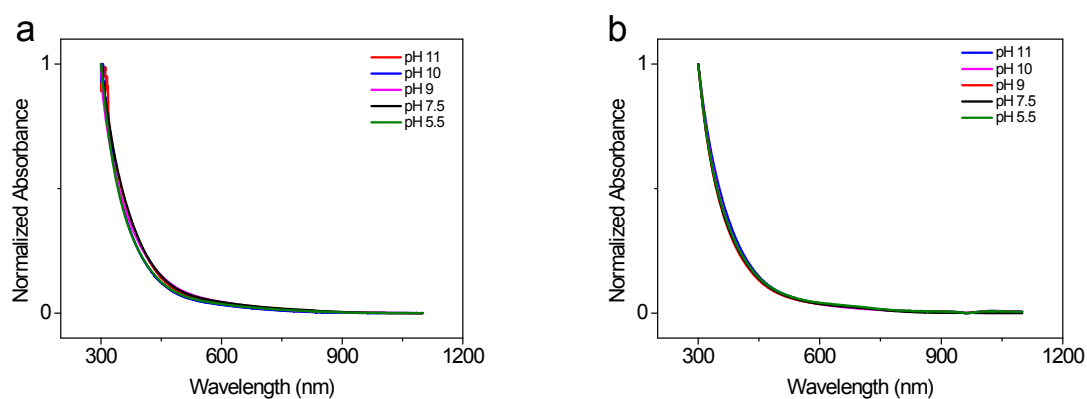

**Fig. S7.** Normalized absorbance graphs of the PEI/2MPA coated Ag<sub>2</sub>S NIRQDs synthesized in different pH values: (a) 60 % PEI / 40 % 2MPA ; (b) 80 % PEI / 20 % 2MPA.

### pH dependent luminescence behavior of Ag<sub>2</sub>S NIRQDs

pH of the aqueous Ag<sub>2</sub>S NIRQDs synthesized at pH 9 with PEI/2MPA mole ratio of 80/20 were adjusted to basic (pH 9.0), neutral (pH 7.4) and acidic (pH 5.5) pH, after being washed. Fig. S8 shows the normalized absorbance spectra of these QDs.

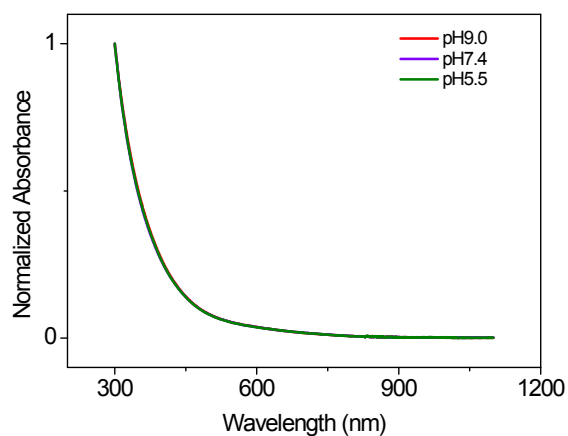

Fig. S8. Normalized absorbance graphs of Ag<sub>2</sub>S NIRQDs (80/20 PEI/2MPA) at different pH values.

### Long term stability of Ag<sub>2</sub>S-PEI/2MPA QDs

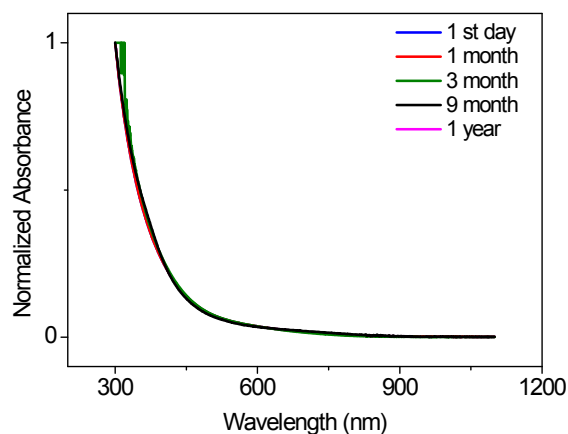

Fig. S9. Normalized absorbance spectra of Ag<sub>2</sub>S NIRQDs with 80/20 PEI/2MPA at different time points following its synthesis.

### XRD analysis of Ag<sub>2</sub>S NIRQDs

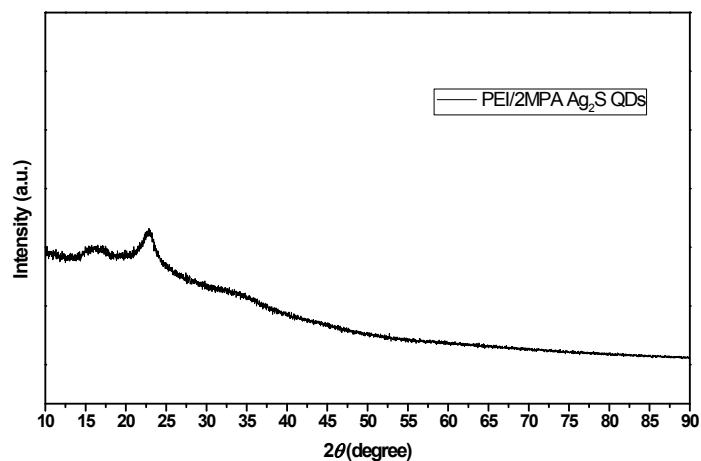

Fig. S10. XRD pattern of the Ag<sub>2</sub>S NIRQD.

### Optical Imaging of HeLa cells

Near IR images of Ag<sub>2</sub>S NIRQD untreated and treated cells were recorded on a CLM. The red color shows quantum dots in the cell. The scale means the intensity of QD emission.

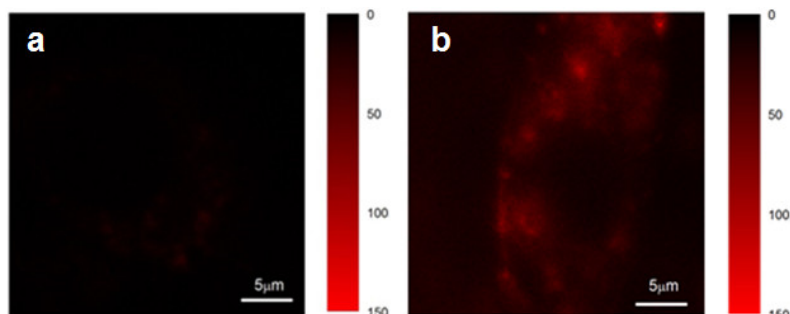

**Fig. S11.** Confocal images of HeLa cells. Cells untreated with QDs (a), cells with QDs (b). Red color shows the quantum dots.
